# Supplementary material for: TM6SF2 rs58542926 influences hepatic fibrosis progression in patients with non-alcoholic fatty liver disease
Source: Springer Nature journal article supplement (doi:10.1038/ncomms5309), 2014-06-30
Supplement: 41467_2014_BFncomms5309_MOESM1200_ESM.pdf [file 41467_2014_BFncomms5309_MOESM1200_ESM.pdf]

SUPPLEMENTARY INFORMATION

**Supplementary Table 1: Genotype frequency of *TM6SF2* rs58542926 in Discovery Cohort NAFLD patients vs. the 1000 Genomes European Caucasian population sample.**

| <i>TM6SF2</i> Genotypes | NAFLD<br>N=349 (%) | EUR Pop.<br>N=379 (%) | OR (95% CI)         | P-value      |
|-------------------------|--------------------|-----------------------|---------------------|--------------|
| CC                      | 271 (77.6%)        | 328 (86.5%)           | -                   | -            |
| CT                      | 70 (20%)           | 49 (12.9%)            | OR 1.72 (1.16-2.57) | <b>0.008</b> |
| TT                      | 8 (2.3%)           | 2 (0.5%)              | OR 4.84 (1.01-22.9) | <b>0.049</b> |

ChiSq for trend  $p=0.0008$  ( $X^2=11.34$ ,  $df=1$ ).

1000 Genomes MAF (EUR) = 0.07 (<http://browser.1000genomes.org>).

**Supplementary Table 2: Genotype frequency of *PNPLA3* rs738409 in Discovery Cohort NAFLD patients vs. the 1000 Genomes European Caucasian population sample.**

| <i>PNPLA3</i><br>Genotypes | NAFLD<br>N=349 (%) | EUR Pop.<br>N=379 (%) | OR (95% CI)         | P-value                      |
|----------------------------|--------------------|-----------------------|---------------------|------------------------------|
| CC                         | 152 (43.5%)        | 233 (61.5%)           | -                   | -                            |
| CG                         | 148 (42.4%)        | 128 (33.8%)           | OR 1.77 (1.29-2.42) | <b>0.0003</b>                |
| GG                         | 49 (14%)           | 18 (4.7%)             | OR 4.17 (2.34-7.43) | <b>3.04 x10<sup>-7</sup></b> |

ChiSq for trend  $p<0.0001$  ( $X^2=31.29$ ,  $df=1$ ).

1000 Genomes MAF (EUR) = 0.22 (<http://browser.1000genomes.org>).

**Supplementary Table 3: Comparison of the FLIP SAF Score and the NAFLD CRN (Kleiner) Score for the histological grading and staging of NAFLD/NASH.**

| SAF Score <sup>1,2</sup>              |                     |                                                               | Kleiner Score <sup>3</sup> |                                               |                                         |
|---------------------------------------|---------------------|---------------------------------------------------------------|----------------------------|-----------------------------------------------|-----------------------------------------|
| Histological Feature                  | Category Definition |                                                               | Histological Feature       | Category Definition                           |                                         |
| Steatosis                             | 0                   | <5%                                                           | Steatosis                  | 0                                             | <5%                                     |
|                                       | 1                   | 5-33%                                                         |                            | 1                                             | 5-33%                                   |
|                                       | 2                   | 34-66%                                                        |                            | 2                                             | 34-66%                                  |
|                                       | 3                   | >66%                                                          |                            | 3                                             | >66%                                    |
| <b>(S) Steatosis Score 0-3</b>        |                     |                                                               | <b>PLUS</b>                |                                               |                                         |
| Hepatocyte Ballooning                 | 0                   | None                                                          | Hepatocyte Ballooning      | 0                                             | None                                    |
|                                       | 1                   | Clusters of hepatocytes with rounded shape and pale cytoplasm |                            | 1                                             | Few                                     |
|                                       | 2                   | Same as grade 1 with enlarged hepatocytes (>2x normal size)   |                            | 2                                             | Many                                    |
| <b>PLUS</b>                           |                     |                                                               | <b>PLUS</b>                |                                               |                                         |
| Inflammation                          | 0                   | None                                                          | Inflammation               | 0                                             | None                                    |
|                                       | 1                   | < 2 foci per 20x field                                        |                            | 1                                             | 1-2 foci per x20 field                  |
|                                       | 2                   | > 2 foci per 20x field                                        |                            | 2                                             | 2-4 foci per x20 field                  |
| <b>(A) Total = Activity Score 0-4</b> |                     |                                                               |                            | <b>(NAS) Total = NAFLD Activity Score 0-8</b> |                                         |
| Fibrosis                              | 0                   | No fibrosis                                                   | Fibrosis                   | 0                                             | No fibrosis                             |
|                                       | 1a                  | Zone 3 mild perisinusoidal fibrosis                           |                            | 1a                                            | Zone 3 mild perisinusoidal fibrosis     |
|                                       | 1b                  | Zone 3 moderate perisinusoidal fibrosis                       |                            | 1b                                            | Zone 3 moderate perisinusoidal fibrosis |
|                                       | 1c                  | Periportal/portal fibrosis only                               |                            | 1c                                            | Periportal/portal fibrosis only         |
|                                       | 2                   | Zone 3 plus portal/periportal fibrosis                        |                            | 2                                             | Zone 3 plus portal/periportal fibrosis  |
|                                       | 3                   | Bridging fibrosis                                             |                            | 3                                             | Bridging fibrosis                       |
|                                       | 4                   | Cirrhosis                                                     |                            | 4                                             | Cirrhosis                               |
| <b>(F) Fibrosis Stage 0-4</b>         |                     |                                                               | <b>Fibrosis Stage 0-4</b>  |                                               |                                         |

Table modified from (Dyson et al, 2013<sup>4</sup>) with permission.

## SUPPLEMENTARY REFERENCES

1. Bedossa P, *et al.* Histopathological algorithm and scoring system for evaluation of liver lesions in morbidly obese patients. *Hepatology* **56**, 1751-1759 (2012).
2. Bedossa P, *et al.* Utility and appropriateness of the FLIP algorithm and SAF score in the evaluation of biopsies of nonalcoholic fatty liver disease. *Hepatology*, (2014).
3. Kleiner DE, *et al.* Design and validation of a histological scoring system for nonalcoholic fatty liver disease. *Hepatology* **41**, 1313-1321 (2005).
4. Dyson JK, McPherson S, Anstee QM. Non-alcoholic fatty liver disease: non-invasive investigation and risk stratification. *Journal of clinical pathology* **66**, 1033-1045 (2013).
